# Supplementary material
Source: publisher figshare collection journal article supplement (https://tandf.figshare.com/ndownloader/files/22643444)
Supplement: Supplementary file 1 [file 22643444]

# Supplemental Material for “Autoregression Model with Spatial Dependence and Missing Data”

Jing Zhou<sup>1</sup>, Jin Liu<sup>2</sup>, Feifei Wang<sup>1</sup>, and Hansheng Wang<sup>2</sup>

<sup>1</sup>*Renmin University of China, and* <sup>2</sup>*Peking University*

## APPENDIX

### *Appendix A: Technical Lemmas*

To establish the theoretical results in Section 3, the following technical lemmas are considered.

**Lemma 1.** *The OLS estimator of  $\alpha_i$  is not consistent.*

PROOF: Define

$$A_{1i} = \frac{1}{T-1} \sum_{t=2}^T Z_{it} Z_{i(t-1)} Y_{i(t-1)}^2, \quad B_{1i} = \frac{1}{T-1} \sum_{t=2}^T Z_{it} Z_{i(t-1)} Y_{i(t-1)} \varepsilon_{it}.$$

Then, we have  $\hat{\alpha}_i^{LSE} - \alpha_i = A_{1i}^{-1} B_{1i}$  and compute the following equation,

$$\begin{aligned} E(B_{1i}) &= \frac{1}{T-1} \sum_{t=2}^T E\{Z_{it} Z_{i(t-1)} Y_{i(t-1)} \varepsilon_{it}\} \\ &= \frac{1}{T-1} \sum_{t=2}^T E\left[Y_{i(t-1)} \varepsilon_{it} \left\{ E(Z_{it} | \mathcal{F}) E(Z_{i(t-1)} | \mathcal{F}) \right\}\right] \\ &= \frac{1}{T-1} \sum_{t=2}^T E\left\{ Y_{i(t-1)} \varepsilon_{it} p_{it} p_{i(t-1)} \right\} = E\left\{ Y_{i(t-1)} \varepsilon_{it} p_{it} p_{i(t-1)} \right\} \neq 0 \\ E(A_{1i}) &= \frac{1}{T-1} \sum_{t=2}^T E\{Z_{it} Z_{i(t-1)} Y_{i(t-1)}^2\} = E\left\{ Y_{i(t-1)}^2 p_{it} p_{i(t-1)} \right\} \rightarrow c > 0. \end{aligned}$$

By the law of large numbers, we have  $A_{1i} \rightarrow_p E(A_{1i}) \rightarrow c$  and  $B_{1i} \rightarrow_p E(B_{1i}) \rightarrow 0$ .

With Slutsky's Theorem, we can show that  $\hat{\alpha}_i^{LSE}$  is inconsistent.

**Lemma 2.** Assume  $M_1$  and  $M_2$  are  $N \times N$  square matrices. Let  $\mathbb{U} = (u_1, \dots, u_N)^\top$  follows a  $N$ -dimensional standard normal distribution. Then, we have

$$(i) \ E(\mathbb{U}^\top M_1 \mathbb{U}) = \text{tr}(M_1);$$

$$(ii) \ E(\mathbb{U}^\top M_1 \mathbb{U} \cdot \mathbb{U}^\top M_2 \mathbb{U}) = \text{tr}(M_1)\text{tr}(M_2) + 2\text{tr}(M_1 M_2);$$

$$(iii) \ \text{cov}(\mathbb{U}^\top M_1 \mathbb{U}, \mathbb{U}^\top M_2 \mathbb{U}) = 2\text{tr}(M_1 M_2);$$

$$(iv) \ \text{var}(\mathbb{U}^\top M_1 \mathbb{U}) = 2\text{tr}(M_1^2).$$

PROOF: This Lemma follows Lemma A.11 in the supplement of Lee (2004).

**Lemma 3.** Define  $\mathcal{S} = (N(T-1))^{-1}(2\sigma^2)^{-1} \sum_{t=2}^T \mathcal{E}_t^\top \dot{A}_t(\rho) \mathcal{E}_t$ , and  $\mathcal{S}_1 = (N(T-1))^{-1}(2\sigma^2)^{-1} \sum_{t=2}^T \mathcal{E}_t^\top A_t(\rho) \mathcal{E}_t$ . Assume the conditions in Theorem 3 hold, we have

$$\begin{aligned} \sqrt{N(T-1)}\{\mathcal{S} - E(\mathcal{S})\} &\rightarrow_d N(0, \Delta_{11}), \\ \sqrt{N(T-1)}\{\mathcal{S}_1 - E(\mathcal{S}_1)\} &\rightarrow_d N(0, \sigma^4 \Delta_{22}). \end{aligned}$$

PROOF: Denote  $\mathbb{U}_t = \Sigma^{-1/2} \mathcal{E}_t = \sigma^{-1} \Omega(\rho)^{1/2} \mathcal{E}_t = (U_{1t}, \dots, U_{Nt})^\top$ , where  $\mathbb{U}_t$  follows a  $N$ -dimensional standard normal distribution. Denote  $B_t(\rho) = \Omega(\rho)^{-1/2} A_t(\rho) \Omega(\rho)^{-1/2}$ , and  $\dot{B}_t(\rho) = \Omega(\rho)^{-1/2} \dot{A}_t(\rho) \Omega(\rho)^{-1/2}$ , i.e.,

$$\dot{B}_t(\rho) = \Omega(\rho)^{-1/2} [\mathcal{Z}_t \mathcal{P}_t^{-1} \{\dot{\Omega}(\rho) - \text{diag}(\dot{\Omega}(\rho))\} \mathcal{P}_t^{-1} \mathcal{Z}_t + \text{diag}(\dot{\Omega}(\rho)) \mathcal{P}_t^{-1} \mathcal{Z}_t] \Omega(\rho)^{-1/2}.$$

Then, we have

$$\mathcal{S} = \frac{1}{2N(T-1)} \sum_{t=2}^T \mathbb{U}_t^\top \Omega(\rho)^{-1/2} \dot{A}_t(\rho) \Omega(\rho)^{-1/2} \mathbb{U}_t = \frac{1}{2N(T-1)} \sum_{t=2}^T \mathbb{U}_t^\top \dot{B}_t(\rho) \mathbb{U}_t.$$

Then, by Lemma 2, we have the expectation of  $\mathcal{S}$  as,

$$\begin{aligned} E(\mathcal{S}) &= \frac{1}{2N(T-1)} \sum_{t=2}^T E \left[ E \left\{ \mathbb{U}_t^\top \dot{B}_t(\rho) \mathbb{U}_t | \mathcal{F} \right\} \right] = \frac{1}{2N(T-1)} \sum_{t=2}^T E \left[ \text{tr} \left\{ \dot{B}_t(\rho) \right\} \right] \\ &= \frac{1}{2N(T-1)} \sum_{t=2}^T E \left[ \text{tr} \left\{ \dot{A}_t(\rho) \Omega(\rho)^{-1} \right\} \right] = \frac{1}{2N} \text{tr} \left\{ \dot{\Omega}(\rho) \Omega(\rho)^{-1} \right\}. \end{aligned}$$

The associated second moment is

$$\begin{aligned} E(\mathcal{S}^2) &= E \left\{ E(\mathcal{S}^2 | \mathcal{F}) \right\} = \frac{1}{4N^2(T-1)^2} E \left( \sum_{t=2}^T E \left[ \left\{ \mathbb{U}_t^\top \dot{B}_t(\rho) \mathbb{U}_t \right\}^2 | \mathcal{F} \right] + \right. \\ &\quad \left. \sum_{t_1 \neq t_2} E \left[ \left\{ \mathbb{U}_{t_1}^\top \dot{B}_{t_1}(\rho) \mathbb{U}_{t_1} \right\} \left\{ \mathbb{U}_{t_2}^\top \dot{B}_{t_2}(\rho) \mathbb{U}_{t_2} \right\} | \mathcal{F} \right] \right) \\ &= \frac{1}{4N^2(T-1)^2} \left( \sum_{t=2}^T E \left[ 2\text{tr} \left\{ \dot{B}_t^2(\rho) \right\} \right] + \sum_{t_1=2}^T \sum_{t_2=2}^T E \left[ \text{tr} \left\{ \dot{B}_{t_1}(\rho) \right\} \text{tr} \left\{ \dot{B}_{t_2}(\rho) \right\} \right] \right) \\ &= \frac{1}{4N^2(T-1)^2} \left( \sum_{t=2}^T E \left[ 2\text{tr} \left\{ \dot{B}_t^2(\rho) \right\} + \text{tr}^2 \left\{ \dot{B}_t(\rho) \right\} \right] + \sum_{t_1 \neq t_2} \text{tr}^2 \left\{ \dot{\Omega}(\rho) \Omega(\rho)^{-1} \right\} \right). \end{aligned}$$

Consequently, we have

$$\begin{aligned} (N(T-1))\text{cov}(\mathcal{S}) &= (N(T-1)) \{ E(\mathcal{S}^2) - E^2(\mathcal{S}) \} \\ &= \frac{1}{4N(T-1)} \sum_{t=2}^T E \left[ 2\text{tr} \left\{ \dot{B}_t^2(\rho) \right\} + \text{tr}^2 \left\{ \dot{B}_t(\rho) \right\} \right] - \frac{1}{4N} \text{tr}^2 \left\{ \dot{\Omega}(\rho) \Omega(\rho)^{-1} \right\} \\ &= \frac{1}{4N(T-1)} \sum_{t=2}^T E \left( 2\text{tr} \left[ \left\{ \dot{A}_t(\rho) \Omega(\rho)^{-1} \right\}^2 \right] + \text{tr}^2 \left\{ \dot{A}_t(\rho) \Omega(\rho)^{-1} \right\} \right) - \frac{1}{4N} \text{tr}^2 \left\{ \dot{\Omega}(\rho) \Omega(\rho)^{-1} \right\} \\ &\rightarrow \Delta_{11}. \end{aligned}$$

According to Lemma 2 of Sun and Wang (2019), we can obtain the asymptotic normality of  $\mathcal{S}$ . Similar results can be obtained for  $\mathcal{S}_1$  following the same logic, where  $E(\mathcal{S}_1) = 1/2$ , and  $(N(T-1))\text{cov}(\mathcal{S}_1) = (4NT-4N)^{-1} \sum_{t=2}^T E \left( 2\text{tr} \left[ \left\{ A_t(\rho) \Omega(\rho)^{-1} \right\}^2 \right] + \right.$

$\text{tr}^2\{A_t(\rho)\Omega(\rho)^{-1}\}\Big] - N/4 \rightarrow \sigma^4\Delta_{22}$ . In addition, we have

$$\begin{aligned} (N(T-1))\text{cov}(\mathcal{S}, \mathcal{S}_1) &= (4NT - 4N)^{-1} \sum_{t=2}^T E \left[ 2\text{tr} \left\{ \dot{A}_t(\rho) A_t(\rho) \Omega(\rho)^{-2} \right\} \right. \\ &\quad \left. + \text{tr} \left\{ \dot{A}_t(\rho) \Omega(\rho)^{-1} \right\} \text{tr} \left\{ A_t(\rho) \Omega(\rho)^{-1} \right\} \right] - \frac{1}{4} \text{tr} \left\{ \dot{\Omega}(\rho) \Omega(\rho)^{-1} \right\} \rightarrow -\sigma^2 \Delta_{12}. \end{aligned}$$

This completes the proof of Lemma 3.

**Lemma 4** (Asymptotic normality of the ideal estimation equation). *Under the conditions in Theorem 3, we have*

$$\frac{1}{\sqrt{NT}} \frac{d\ell_1(\theta)}{d\theta} \rightarrow_d N(0, \Delta),$$

where  $\Delta$  is defined as in condition (C1).

PROOF: Recall the likelihood function for  $\theta$ ,

$$\ell_1(\theta) = \ell_1(\rho, \sigma^2) = \frac{T-1}{2} \log |\Omega(\rho)| - \frac{N(T-1)}{2} \log(\sigma^2) - \frac{1}{2\sigma^2} \sum_{t=2}^T \mathcal{E}_t^\top A_t(\rho) \mathcal{E}_t.$$

The associated first derivative is

$$\begin{aligned} \frac{d\ell_1(\theta)}{d\rho} &= \frac{T-1}{2} \text{tr} \{ \Omega^{-1}(\rho) \dot{\Omega}(\rho) \} - \frac{1}{2\sigma^2} \sum_{t=2}^T \mathcal{E}_t^\top \dot{A}_t(\rho) \mathcal{E}_t = -N(T-1)(\mathcal{S} - E\mathcal{S}) \\ \frac{d\ell_1(\theta)}{d\sigma^2} &= -\frac{N(T-1)}{2} \frac{1}{\sigma^2} + \frac{1}{2\sigma^4} \sum_{t=2}^T \mathcal{E}_t^\top A_t(\rho) \mathcal{E}_t = \frac{N(T-1)}{\sigma^2} (\mathcal{S}_1 - E\mathcal{S}_1). \end{aligned}$$

Then, we have

$$\frac{1}{\sqrt{NT}} \frac{d\ell_1(\theta)}{d\theta} = \begin{pmatrix} \frac{1}{\sqrt{N(T-1)}} \frac{d\ell_1(\theta)}{d\rho} \\ \frac{1}{\sqrt{N(T-1)}} \frac{d\ell_1(\theta)}{d\sigma^2} \end{pmatrix} + o_p(1) = \begin{pmatrix} -\sqrt{N(T-1)}(\mathcal{S} - E\mathcal{S}) \\ \frac{1}{\sigma^2} \sqrt{N(T-1)}(\mathcal{S}_1 - E\mathcal{S}_1) \end{pmatrix} + o_p(1).$$

By Lemma 3 and condition (C1), we have  $(N(T-1))^{-1/2}d\ell_1(\theta)/d\rho \rightarrow_d N(0, \Delta_{11})$ ,  $(N(T-1))^{-1/2}d\ell_1(\theta)/d\sigma^2 \rightarrow_d N(0, \Delta_{22})$ , and  $(N(T-1))^{-1}\text{cov}\{d\ell_1(\theta)/d\rho, d\ell_1(\theta)/d\sigma^2\} \rightarrow \Delta_{12}$ . Then, we can derive the asymptotic normal distribution of  $(NT)^{-1/2}d\ell_1(\theta)/d\theta$  using the central limit theorem for linear-quadratic forms. Thus, the proof of Lemma 4 is completed.

**Lemma 5.** *Under the conditions in Theorem 3, the symmetric information matrix  $\Lambda_{1,NT} = -(NT)^{-1}\{d^2\ell_1(\theta)/d\theta d\theta^\top\}$ , we have  $\Lambda_{1,NT} \rightarrow_p \Lambda$ .*

PROOF: The second derivative for the likelihood of  $\theta$  is specified as follows

$$\begin{aligned} -\frac{d^2\ell_1(\theta)}{d\rho^2} &= \frac{T-1}{2}\text{tr}\left[\{\Omega^{-1}(\rho)\dot{\Omega}(\rho)\}^2 - \Omega^{-1}(\rho)\ddot{\Omega}(\rho)\right] + \frac{1}{2\sigma^2}\sum_{t=2}^T \mathcal{E}_t^\top \ddot{A}_t(\rho)\mathcal{E}_t \\ -\frac{d^2\ell_1(\theta)}{d\rho d\sigma^2} &= -\frac{d^2\ell_1(\theta)}{d\sigma^2 d\rho} = -\frac{1}{2\sigma^4}\sum_{t=2}^T \mathcal{E}_t^\top \dot{A}_t(\rho)\mathcal{E}_t \\ -\frac{d^2\ell_1(\theta)}{d\sigma^2 d\sigma^2} &= -\frac{N(T-1)}{2}\frac{1}{\sigma^4} + \frac{1}{\sigma^4}\frac{1}{\sigma^2}\sum_{t=2}^T \mathcal{E}_t^\top A_t(\rho)\mathcal{E}_t. \end{aligned}$$

Note that  $E\{\sigma^{-2}\mathcal{E}_t^\top \ddot{A}_t(\rho)\mathcal{E}_t\} = \text{tr}\{\Omega^{-1}(\rho)\ddot{\Omega}(\rho)\}$ , then, we have

$$\begin{aligned} -\frac{1}{N(T-1)}E\left\{\frac{d^2\ell_1(\theta)}{d\rho^2}\right\} &= \frac{1}{2N}\text{tr}\left[\{\Omega^{-1}(\rho)\dot{\Omega}(\rho)\}^2\right] \rightarrow \Lambda_{11} \\ -\frac{1}{N(T-1)}E\left\{\frac{d^2\ell_1(\theta)}{d\rho d\sigma^2}\right\} &= -\frac{1}{2N\sigma^2}\text{tr}\{\Omega^{-1}(\rho)\dot{\Omega}(\rho)\} \rightarrow \Lambda_{12} \\ -\frac{1}{N(T-1)}E\left\{\frac{d^2\ell_1(\theta)}{d\sigma^2 d\sigma^2}\right\} &= \frac{1}{2\sigma^4} \rightarrow \Lambda_{22}. \end{aligned}$$

For  $\Lambda_{1,NT}$ , we have

$$\Lambda_{1,NT} = \frac{1}{NT}\left\{\frac{d^2\ell_1(\theta)}{d\theta d\theta^\top}\right\} = \frac{1}{N(T-1)}E\left\{\frac{d^2\ell_1(\theta)}{d\theta d\theta^\top}\right\} + o_p(1) \rightarrow \Lambda.$$

This follows by condition (C2). Thus, we have  $\Lambda_{1,NT} \rightarrow_p \Lambda$ . This completes the proof

of Lemma 5.

**Lemma 6** (Asymptotic normality of the feasible estimation equation). *Assume conditions (C1)–(C3), we have*

$$\frac{1}{\sqrt{NT}} \left\{ \frac{d\ell_1(\theta)}{d\theta} - \frac{d\ell_2(\theta)}{d\theta} \right\} = o_p(1).$$

Then, by the Lemma 4, we have  $(NT)^{-1/2} d\ell_2(\theta)/d\theta \rightarrow_d N(0, \Delta)$ .

PROOF: Define  $\hat{\mathcal{P}}_t = \text{diag}\{\hat{p}_{it}\hat{p}_{i(t-1)}\} \in \mathbb{R}^{N \times N}$ . Recall the feasible weighted log-likelihood is specified as :

$$\ell_2(\theta) = \ell_2(\rho, \sigma^2) = \frac{T-1}{2} \log |\Omega(\rho)| - \frac{N(T-1)}{2} \log(\sigma^2) - \frac{1}{2\sigma^2} \sum_{t=2}^T \hat{\mathcal{E}}_t^\top \hat{A}_t(\rho) \hat{\mathcal{E}}_t,$$

where  $\hat{A}_t(\rho) = \mathcal{Z}_t \hat{\mathcal{P}}_t^{-1} \{\Omega(\rho) - \text{diag}(\Omega(\rho))\} \hat{\mathcal{P}}_t^{-1} \mathcal{Z}_t + \text{diag}(\Omega(\rho)) \hat{\mathcal{P}}_t^{-1} \mathcal{Z}_t$ ,  $\hat{\mathcal{E}}_t = (\hat{\varepsilon}_{1t}, \dots, \hat{\varepsilon}_{Nt})^\top$ , and  $\hat{\varepsilon}_{it} = Y_{it} - \hat{\alpha}_i Y_{i(t-1)}$ . The associated first derivative is

$$\begin{aligned} \frac{d\ell_2(\theta)}{d\rho} &= \frac{T-1}{2} \text{tr}\{\Omega^{-1}(\rho) \dot{\Omega}(\rho)\} - \frac{1}{2\sigma^2} \sum_{t=2}^T \hat{\mathcal{E}}_t^\top \hat{A}_t(\rho) \hat{\mathcal{E}}_t \\ \frac{d\ell_2(\theta)}{d\sigma^2} &= -\frac{N(T-1)}{2} \frac{1}{\sigma^2} + \frac{1}{2\sigma^4} \sum_{t=2}^T \hat{\mathcal{E}}_t^\top \hat{A}_t(\rho) \hat{\mathcal{E}}_t. \end{aligned}$$

Compared to  $d\ell_1(\theta)/d\theta = (d\ell_1(\theta)/d\rho, d\ell_1(\theta)/d\sigma^2)^\top$ , we have

$$-\left\{ \frac{d\ell_2(\theta)}{d\rho} - \frac{d\ell_1(\theta)}{d\rho} \right\} = \frac{1}{2\sigma^2} \left\{ \sum_{t=2}^T \hat{\mathcal{E}}_t^\top \hat{A}_t(\rho) \hat{\mathcal{E}}_t - \sum_{t=2}^T \mathcal{E}_t^\top \dot{A}_t(\rho) \mathcal{E}_t \right\}. \quad (\text{A.1})$$

To prove the Lemma, we can assume  $\sigma^2 = 1$ , and it suffices to show that

$$\frac{1}{\sqrt{N(T-1)}} \sum_{t=2}^T \left\{ \hat{\mathcal{E}}_t^\top \hat{A}_t(\rho) \hat{\mathcal{E}}_t - \mathcal{E}_t^\top \dot{A}_t(\rho) \mathcal{E}_t \right\} = \frac{1}{\sqrt{N(T-1)}} \sum_{t=2}^T L_{1,t} = o_p(1), \quad (\text{A.2})$$

where  $L_{1,t} = \hat{\mathcal{E}}_t^\top \hat{A}_t(\rho) \hat{\mathcal{E}}_t - \mathcal{E}_t^\top \dot{A}_t(\rho) \mathcal{E}_t = \hat{\mathcal{E}}_t^\top \dot{A}_t(\rho) \hat{\mathcal{E}}_t - \mathcal{E}_t^\top \dot{A}_t(\rho) \mathcal{E}_t + \hat{\mathcal{E}}_t^\top \{\hat{A}_t(\rho) - \dot{A}_t(\rho)\} \hat{\mathcal{E}}_t$ . Note that  $\mathcal{E}_t = \mathbb{Y}_t - \text{diag}(\mathbb{Y}_{t-1})\alpha$  and  $\hat{\mathcal{E}}_t = \mathbb{Y}_t - \text{diag}(\mathbb{Y}_{t-1})\hat{\alpha} = \mathcal{E}_t - \text{diag}(\mathbb{Y}_{t-1})(\hat{\alpha} - \alpha)$ , where  $\mathbb{Y}_t = (Y_{1t}, \dots, Y_{Nt})^\top$  and  $\hat{\alpha} = (\hat{\alpha}_1, \dots, \hat{\alpha}_N)^\top$ . Then, we have  $\hat{\mathcal{E}}_t^\top \dot{A}_t(\rho) \hat{\mathcal{E}}_t = \{\mathcal{E}_t - \text{diag}(\mathbb{Y}_{t-1})(\hat{\alpha} - \alpha)\}^\top \dot{A}_t(\rho) \{\mathcal{E}_t - \text{diag}(\mathbb{Y}_{t-1})(\hat{\alpha} - \alpha)\}$ , and

$$\begin{aligned} \hat{\mathcal{E}}_t^\top \dot{A}_t(\rho) \hat{\mathcal{E}}_t - \mathcal{E}_t^\top \dot{A}_t(\rho) \mathcal{E}_t &= (\hat{\alpha} - \alpha)^\top \text{diag}(\mathbb{Y}_{t-1}) \dot{A}_t(\rho) \text{diag}(\mathbb{Y}_{t-1})(\hat{\alpha} - \alpha) \\ &\quad - 2\mathcal{E}_t^\top \dot{A}_t(\rho) \text{diag}(\mathbb{Y}_{t-1})(\hat{\alpha} - \alpha) = L_{1,t1} + L_{1,t2}. \end{aligned}$$

Then, we have

$$\sum_{t=2}^T L_{1,t2} = 2 \sum_{t=2}^T \mathcal{E}_t^\top \dot{A}_t(\rho) \text{diag}(\mathbb{Y}_{t-1})(\alpha - \hat{\alpha}) \leq \sup_i (\alpha_i - \hat{\alpha}_i) \left| 2 \sum_{t=2}^T \text{diag}(\mathbb{Y}_{t-1}) \dot{A}_t(\rho) \mathcal{E}_t \right|$$

Since  $\sqrt{T}(\tilde{\alpha}_i^{WLS E} - \alpha_i)$  is asymptotic normal and  $(NT)^{-1/2} \sum_{t=2}^T \text{diag}(\mathbb{Y}_{t-1}) \dot{A}_t(\rho) \mathcal{E}_t = O_p(1)$ . We can show that  $(NT)^{-1/2} \sum_{t=2}^T L_{1,t2} = o_p(1)$ . Similarly, we can show that  $(NT)^{-1/2} \sum_{t=2}^T L_{1,t1} = o_p(1)$ . Next, considering

$$\begin{aligned} \hat{A}_t(\rho) - A_t(\rho) &= \mathcal{Z}_t \left( \hat{\mathcal{P}}_t^{-1} - \mathcal{P}_t^{-1} \right) \left[ \Omega(\rho) - \text{diag}\{\Omega(\rho)\} \right] \left( \hat{\mathcal{P}}_t^{-1} - \mathcal{P}_t^{-1} \right) \mathcal{Z}_t \\ &\quad + \mathcal{Z}_t \left( \hat{\mathcal{P}}_t^{-1} - \mathcal{P}_t^{-1} \right) \left[ \Omega(\rho) - \text{diag}\{\Omega(\rho)\} \right] \mathcal{P}_t^{-1} \mathcal{Z}_t \\ &\quad + \mathcal{Z}_t \mathcal{P}_t^{-1} \left[ \Omega(\rho) - \text{diag}\{\Omega(\rho)\} \right] \left( \hat{\mathcal{P}}_t^{-1} - \mathcal{P}_t^{-1} \right) \mathcal{Z}_t + \text{diag}\{\Omega(\rho)\} \left( \hat{\mathcal{P}}_t^{-1} - \mathcal{P}_t^{-1} \right) \mathcal{Z}_t. \end{aligned}$$

Then, we can show that  $\hat{A}_t(\rho) - A_t(\rho) = o_p(1)$ , and  $\hat{\dot{A}}_t(\rho) - \dot{A}_t(\rho) = o_p(1)$ . We have  $L_{1,t3} = \hat{\mathcal{E}}_t^\top \{\hat{A}_t(\rho) - \dot{A}_t(\rho)\} \hat{\mathcal{E}}_t = \mathcal{E}_t^\top \{\hat{A}_t(\rho) - \dot{A}_t(\rho)\} \mathcal{E}_t + o_p(1) = o_p(1)$ . Therefore,  $(NT)^{-1/2} \sum_{t=2}^T L_{1,t} = o_p(1)$ , i.e., (A.2) holds. In addition,  $\frac{1}{\sqrt{NT}} \left\{ \frac{d\ell_2(\theta)}{d\sigma^2} - \frac{d\ell_1(\theta)}{d\sigma^2} \right\} = \frac{1}{2\sigma^4} \sum_{t=2}^T \{\hat{\mathcal{E}}_t^\top \hat{A}_t(\rho) \hat{\mathcal{E}}_t - \mathcal{E}_t^\top A_t(\rho) \mathcal{E}_t\} = o_p(1)$ . Thus, we have

$$\frac{1}{\sqrt{NT}} \left\{ \frac{d\ell_2(\theta)}{d\theta} - \frac{d\ell_1(\theta)}{d\theta} \right\} = o_p(1).$$

Following Lemma 4, we have the asymptotic normality of  $(NT)^{-1/2}d\ell_2(\theta)/d\theta$ . This completes the proof of Lemma 6.

**Lemma 7.** *The symmetric information matrix  $\Lambda_{2,NT} = -(NT)^{-1}\{d^2\ell_2(\theta)/d\theta d\theta^\top\}$ , we have  $\Lambda_{2,NT} = \Lambda_{1,NT} + o_p(1) \rightarrow_p \Lambda$ .*

PROOF: The second derivative of  $\ell_2(\theta)$  for the likelihood of  $\theta$  is specified as follows

$$\begin{aligned} -\frac{d^2\ell_2(\theta)}{d\rho^2} &= \frac{T-1}{2}\text{tr}\left[\{\Omega^{-1}(\rho)\dot{\Omega}(\rho)\}^2 - \Omega^{-1}(\rho)\ddot{\Omega}(\rho)\right] + \frac{1}{2\sigma^2}\sum_{t=2}^T \hat{\mathcal{E}}_t^\top \hat{A}_t(\rho)\hat{\mathcal{E}}_t \\ -\frac{d^2\ell_2(\theta)}{d\rho d\sigma^2} &= -\frac{d^2\ell_2(\theta)}{d\sigma^2 d\rho} = -\frac{1}{2\sigma^4}\sum_{t=2}^T \hat{\mathcal{E}}_t^\top \hat{A}_t(\rho)\hat{\mathcal{E}}_t \\ -\frac{d^2\ell_2(\theta)}{d\sigma^2 d\sigma^2} &= -\frac{N(T-1)}{2}\frac{1}{\sigma^4} + \frac{1}{\sigma^4}\frac{1}{\sigma^2}\sum_{t=2}^T \hat{\mathcal{E}}_t^\top \hat{A}_t(\rho)\hat{\mathcal{E}}_t. \end{aligned}$$

Following the similar proof of (A.1), we can easily verify  $\Lambda_{2,NT} - \Lambda_{1,NT} = o_p(1)$ . By Lemma 5,  $\Lambda_{1,NT} - \Lambda = o_p(1)$ . Therefore, we have  $\Lambda_{2,NT} - \Lambda = o_p(1)$ . Thus, the proof of Lemma 7 is completed.

### Appendix B: Proof of Theorem 1

PROOF: For the ideal WLS estimation of  $\alpha_i$ , define

$$A_{2i} = \frac{1}{T-1}\sum_{t=2}^T \frac{Z_{it}}{p_{it}} \frac{Z_{i(t-1)}}{p_{i(t-1)}} Y_{i(t-1)}^2, \quad B_{2i} = \sqrt{\frac{1}{T-1}}\sum_{t=2}^T \frac{Z_{it}}{p_{it}} \frac{Z_{i(t-1)}}{p_{i(t-1)}} Y_{i(t-1)} \varepsilon_{it}.$$

Then, we have

$$\sqrt{T-1}(\tilde{\alpha}_i^{WLS} - \alpha_i) = A_{2i}^{-1}B_{2i}. \quad (\text{A.3})$$



With Slutsky's Theorem, it is sufficient to prove that

$$A_{2i} \rightarrow_p \sigma_{Y_i}^2, \quad (\text{A.4})$$

$$B_{2i} \rightarrow_d N(0, \sigma_{1i}^2). \quad (\text{A.5})$$

For  $A_{2i}$ , we have

$$\begin{aligned} E(A_{2i}) &= (T-1)^{-1} \sum_{t=2}^T E \left[ Y_{i(t-1)}^2 E \left\{ \frac{Z_{it}}{p_{it}} E \left( \frac{Z_{i(t-1)}}{p_{i(t-1)}} \middle| \mathcal{F} \right) \middle| \mathcal{F} \right\} \right] \\ &= (T-1)^{-1} \sum_{t=2}^T E \{ Y_{i(t-1)}^2 \} = \sigma_{Y_i}^2. \end{aligned}$$

Then, by the law of large numbers, we have  $A_{2i} \rightarrow_p \sigma_{Y_i}^2$ . For  $B_{2i}$ , the expectation and variance are computed as follows

$$\begin{aligned} E(B_{2i}) &= \sqrt{\frac{1}{T-1}} \sum_{t=2}^T E \left[ Y_{i(t-1)} \varepsilon_{it} E \left\{ \frac{Z_{it}}{p_{it}} E \left( \frac{Z_{i(t-1)}}{p_{i(t-1)}} \middle| \mathcal{F} \right) \middle| \mathcal{F} \right\} \right] = 0 \\ E(B_{2i}^2) &= \frac{1}{T-1} \sum_{t=2}^T E \left[ Y_{i(t-1)}^2 \varepsilon_{it}^2 E \left\{ \frac{Z_{it}^2}{p_{it}^2} E \left( \frac{Z_{i(t-1)}^2}{p_{i(t-1)}^2} \middle| \mathcal{F} \right) \middle| \mathcal{F} \right\} \right] \\ &\quad + \frac{2}{T-1} \sum_{t_1 \neq t_2} E \left[ Y_{i(t_1-1)} Y_{i(t_2-1)} \varepsilon_{it_1} \varepsilon_{it_2} E \left\{ \frac{Z_{it_2}}{p_{it_2}} \frac{Z_{i(t_2-1)}}{p_{i(t_2-1)}} E \left( \frac{Z_{it_1}}{p_{it_1}} \frac{Z_{i(t_1-1)}}{p_{i(t_1-1)}} \middle| \mathcal{F} \right) \middle| \mathcal{F} \right\} \right] \\ &= \frac{1}{T-1} \sum_{t=2}^T E \left\{ Y_{i(t-1)}^2 \varepsilon_{it}^2 p_{it}^{-1} p_{i(t-1)}^{-1} \right\} + \frac{2}{T-1} \sum_{t_1 \neq t_2} E \left\{ Y_{i(t_1-1)} Y_{i(t_2-1)} \varepsilon_{it_1} \varepsilon_{it_2} \right\} \\ &= E \left\{ Y_{i(t-1)}^2 \varepsilon_{it}^2 p_{it}^{-1} p_{i(t-1)}^{-1} \right\} = \sigma_{1i}^2. \end{aligned}$$

Then, we have  $(T-1)^{-1/2} B_{2i} \rightarrow_p 0$ . Thus,  $\tilde{\alpha}_i^{WLSE} - \alpha_i \rightarrow_p 0$ . By a slight extension of Example 7.15 in Hamilton (1994), we can obtain the result of equation (A.5). Thus, the proof of Theorem 1 has been completed.

### Appendix C: Proof of Theorem 2

By the theory of logistic regression, we can obtain  $(\hat{\beta} - \beta) = O_p(1/\sqrt{NT})$ . Then with Delta method, we have

$$\begin{aligned}\hat{p}_{it} - p_{it} &= O_p(1/\sqrt{NT}), \quad \hat{p}_{it}^{-1} - p_{it}^{-1} = O_p(1/\sqrt{NT}), \\ \hat{p}_{it}\hat{p}_{i(t-1)} - p_{it}p_{i(t-1)} &= O_p(1/\sqrt{NT}).\end{aligned}$$

For the feasible WLSE, define

$$A_{3i} = \frac{1}{T-1} \sum_{t=2}^T \frac{Z_{it}}{\hat{p}_{it}} \frac{Z_{i(t-1)}}{\hat{p}_{i(t-1)}} Y_{i(t-1)}^2, \quad B_{3i} = \frac{1}{\sqrt{T-1}} \sum_{t=2}^T \frac{Z_{it}}{\hat{p}_{it}} \frac{Z_{i(t-1)}}{\hat{p}_{i(t-1)}} Y_{i(t-1)} \varepsilon_{it}.$$

Then, we have

$$\sqrt{T-1}(\hat{\alpha}_i^{WLS} - \alpha_i) = A_{3i}^{-1} B_{3i}. \quad (\text{A.6})$$

With Slutsky's Theorem, it is sufficient to prove that

$$A_{3i} \rightarrow_p \sigma_{Y_i}^2, \quad (\text{A.7})$$

$$B_{3i} \rightarrow_d N(0, \sigma_{1i}^2). \quad (\text{A.8})$$

For  $A_{3i}$ , we have

$$\begin{aligned}E(A_{3i}) &= (T-1)^{-1} \sum_{t=2}^T E \left[ Y_{i(t-1)}^2 E \left\{ \frac{Z_{it}}{\hat{p}_{it}} E \left( \frac{Z_{i(t-1)}}{\hat{p}_{i(t-1)}} \middle| \mathcal{F} \right) \middle| \mathcal{F} \right\} \right] \\ &= (T-1)^{-1} \sum_{t=2}^T E \left\{ Y_{i(t-1)}^2 \frac{p_{it}}{\hat{p}_{it}} \frac{p_{i(t-1)}}{\hat{p}_{i(t-1)}} \right\} = E(A_{2i}) + O_p(1/\sqrt{NT}) \rightarrow_p \sigma_{Y_i}^2.\end{aligned}$$

Then, by the law of large numbers, we have  $A_{3i} \rightarrow_p \sigma_{Y_i}^2$ . For  $B_3$ , the expectation is

computed as

$$E(B_{3i}) = \sqrt{\frac{1}{T-1}} \sum_{t=2}^T E \left[ Y_{i(t-1)} \varepsilon_{it} E \left\{ \frac{Z_{it}}{\hat{p}_{it}} E \left( \frac{Z_{i(t-1)}}{\hat{p}_{i(t-1)}} \middle| \mathcal{F} \right) \middle| \mathcal{F} \right\} \right] \rightarrow_p 0.$$

Its variance is computed as

$$\begin{aligned} E(B_{3i}^2) &= \frac{1}{T-1} \sum_{t=2}^T E \left[ Y_{i(t-1)}^2 \varepsilon_{it}^2 E \left\{ \frac{Z_{it}^2}{\hat{p}_{it}^2} E \left( \frac{Z_{i(t-1)}^2}{\hat{p}_{i(t-1)}^2} \middle| \mathcal{F} \right) \middle| \mathcal{F} \right\} \right] + \frac{2}{T-1} \sum_{t_1 \neq t_2} \\ &\quad E \left[ Y_{i(t_1-1)} Y_{i(t_2-1)} \varepsilon_{it_1} \varepsilon_{it_2} E \left\{ \frac{Z_{it_2}}{\hat{p}_{it_2}} \frac{Z_{i(t_2-1)}}{\hat{p}_{i(t_2-1)}} E \left( \frac{Z_{it_1}}{\hat{p}_{it_1}} \frac{Z_{i(t_1-1)}}{\hat{p}_{i(t_1-1)}} \middle| \mathcal{F} \right) \middle| \mathcal{F} \right\} \right] \\ &= \frac{1}{T-1} \sum_{t=2}^T E \left\{ Y_{i(t-1)}^2 \varepsilon_{it}^2 \frac{p_{it} p_{i(t-1)}}{\hat{p}_{it}^2 \hat{p}_{i(t-1)}^2} \right\} + \frac{2}{T-1} \sum_{t_1 \neq t_2} E \left\{ Y_{i(t_1-1)} Y_{i(t_2-1)} \varepsilon_{it_1} \varepsilon_{it_2} \frac{p_{it} p_{i(t-1)}}{\hat{p}_{it} \hat{p}_{i(t-1)}} \right\} \\ &= \frac{1}{T-1} \sum_{t=2}^T E \left\{ Y_{i(t-1)}^2 \varepsilon_{it}^2 p_{it}^{-1} p_{i(t-1)}^{-1} \right\} \left\{ 1 + O_p \left( \frac{1}{\sqrt{NT}} \right) \right\} \\ &\quad + \frac{2}{T-1} \sum_{t_1 \neq t_2} E \left\{ Y_{i(t_1-1)} Y_{i(t_2-1)} \varepsilon_{it_1} \varepsilon_{it_2} \right\} \left\{ 1 + O_p \left( \frac{1}{\sqrt{NT}} \right) \right\} \\ &= E(B_{2i}^2) + O_p(1/\sqrt{NT}) \rightarrow_p \sigma_{1i}^2. \end{aligned}$$

Then we have  $(T-1)^{-1/2} B_{3i} \rightarrow_p 0$ . Thus,  $\hat{\alpha}_i^{WLS} - \alpha_i \rightarrow_p 0$ . By a slight extension of Example 7.15 in Hamilton (1994), we can obtain the result of equation (A.8). Thus, the proof of Theorem 2 has been completed.

#### Appendix D: Proof of Theorem 3

The proof is similar to the proof of Theorem 1 in Sun and Wang (2019). The details are given in the following two steps.

Step 1: To demonstrate the consistency of  $\tilde{\theta}^{MLE}$ , we first show that there exists

some constant  $C > 0$  so that

$$\lim_{N,T \rightarrow \infty} P\left\{ \sup_{\|t\|=C} \ell_1(\theta + a(NT)^{-1/2}t) < \ell_1(\theta) \right\} = 1. \quad (\text{A.9})$$

Applying Taylor's expansion to  $\ell_1(\theta + a(NT)^{-1/2}t)$ , we have

$$\begin{aligned} R_{NT}(\theta) &= \ell_1(\theta + (NT)^{-1/2}t) - \ell_1(\theta) \\ &= (NT)^{-1/2}t^\top \frac{d\ell_1(\theta)}{d\theta} + (2NT)^{-1}t^\top \frac{d^2\ell_1(\theta)}{d\theta d\theta^\top} t + o_p(1). \end{aligned} \quad (\text{A.10})$$

From Lemma 2, we know that  $(NT)^{-1/2}d\ell_1(\theta)/d\theta = O_p(1)$ . In addition, we have  $(NT)^{-1}d^2\ell_1(\theta)/d\theta d\theta^\top = -\Lambda_{1,NT} + o_p(1) \rightarrow -\Lambda_1$ . By the similar arguments of Theorem 1 in Sun and Wang (2019), we can obtain the consistency of  $\tilde{\theta}^{MLE}$ . Specifically, the second term of (A.10) is quadratic and negative, and the first term is linear. Then, for a sufficiently large  $C$ , the second term would dominate the first one. Thus, (A.9) holds. In addition, we maximize  $l(\theta)$  at  $\tilde{\theta}^{MLE}$ , which means  $\tilde{\theta}^{MLE}$  is controlled by  $\{\theta + (NT)^{-1/2}t : \|t\| \leq C\}$ . Consequently,  $\|\tilde{\theta}^{MLE}\| = O_p(NT)^{-1/2}$ .

Step 2: To demonstrate the asymptotic normality of  $\tilde{\theta}^{MLE}$ , we take a Taylor expansion of  $d\ell_1(\tilde{\theta}^{MLE})/d\theta = 0$  at the true value of  $\theta$ . This leads to

$$\sqrt{NT}(\tilde{\theta}^{MLE} - \theta) = \left\{ -\frac{1}{NT} \frac{d^2\ell_1(\check{\theta})}{d\theta d\theta^\top} \right\}^{-1} \frac{1}{\sqrt{NT}} \frac{d\ell_1(\theta)}{d\theta},$$

where  $\check{\theta}$  lies between  $\tilde{\theta}^{MLE}$  and  $\theta$ . By the Slutsky's Theorem and Lemma 4, it suffices to show

$$\frac{1}{NT} \frac{d^2\ell_1(\check{\theta})}{d\theta d\theta^\top} - \frac{1}{NT} \frac{d^2\ell_1(\theta)}{d\theta d\theta^\top} = o_p(1). \quad (\text{A.11})$$

Consequently, we only to consider each block of the two related matrices, respectively.

First, we consider

$$\frac{1}{NT} \frac{d^2 \ell_1(\check{\theta})}{d\rho^2} - \frac{1}{NT} \frac{d^2 \ell_1(\theta)}{d\rho^2} = L_{2,NT} = o_p(1). \quad (\text{A.12})$$

The details are given below. Note that  $\ddot{\Omega}(\check{\rho}) \equiv \ddot{\Omega}(\rho)$ , and

$$\Omega^{-1}(\check{\rho})\ddot{\Omega}(\check{\rho}) = \Omega^{-1}(\rho)\ddot{\Omega}(\rho) + \Omega^{-1}(\bar{\rho})\ddot{\Omega}(\bar{\rho})\Omega^{-1}(\bar{\rho})\ddot{\Omega}(\bar{\rho})(\check{\rho} - \rho) \quad (\text{A.13})$$

$$\{\Omega^{-1}(\check{\rho})\dot{\Omega}(\check{\rho})\}^2 = \{\Omega^{-1}(\rho)\dot{\Omega}(\rho)\}^2 + 2\left[\Omega^{-1}(\bar{\rho})\{I - \dot{\Omega}(\bar{\rho})\Omega^{-1}(\bar{\rho})\}\ddot{\Omega}(\bar{\rho})\right](\check{\rho} - \rho) \quad (\text{A.14})$$

with  $\bar{\rho}$  lying between  $\check{\rho}$  and  $\rho$ . We know that

$$\begin{aligned} L_{2,NT} &\doteq \frac{1}{2N} \left[ \text{tr}\{\Omega^{-1}(\check{\rho})\dot{\Omega}(\check{\rho})\}^2 - \text{tr}\{\Omega^{-1}(\rho)\dot{\Omega}(\rho)\}^2 \right] \\ &\quad - \frac{1}{2N} \left[ \text{tr}\{\Omega^{-1}(\check{\rho})\ddot{\Omega}(\check{\rho})\} - \text{tr}\{\Omega^{-1}(\rho)\ddot{\Omega}(\rho)\} \right] + \frac{1}{2} \left( \check{\sigma}^{-2} - \sigma^{-2} \right) \sum_{t=2}^T \mathcal{E}_t^\top \ddot{A}_t(\check{\rho}) \mathcal{E}_t \\ &\quad + \frac{1}{2\sigma^2} \left[ \sum_{t=2}^T \mathcal{E}_t^\top \ddot{A}_t(\check{\rho}) \mathcal{E}_t - \sum_{t=2}^T \mathcal{E}_t^\top \ddot{A}_t(\rho) \mathcal{E}_t \right] \\ &= L_{2,NT,1} + L_{2,NT,2} + L_{2,NT,3} + L_{2,NT,4}. \end{aligned}$$

With the consistency of  $\tilde{\rho}^{MLE}$  and (A.13), we have  $L_{NT,1} = o_p(1)$ . Similarly, by (A.14), we have  $L_{NT,2} = o_p(1)$ . By a similar calculation of (A.1) and the consistency of  $\tilde{\theta}^{MLE} = (\tilde{\rho}^{MLE}, \tilde{\sigma}^{2^{MLE}})^\top$ , we also have  $L_{NT,3} = o_p(1)$ , and  $L_{NT,4} = o_p(1)$ . Then, the equation (A.12) holds, and other blocks of  $\frac{1}{NT} \frac{d^2 \ell_1(\check{\theta})}{d\theta d\theta^\top} - \frac{1}{NT} \frac{d^2 \ell_1(\theta)}{d\theta d\theta^\top}$  are also  $o_p(1)$ . Thus, (A.11) holds, and we have completed the proof of Theorem 3.

#### Appendix E: Proof of Theorem 4

The proof of Theorem 4 is similar to the proof of Theorem 3. We can prove the consistency by the same argument with Lemmas 6 and 7. To show the asymptotic

normality of  $\widehat{\theta}^{MLE}$ , we apply Taylor expansion to  $d\ell_2(\widehat{\theta})/d\theta = 0$  at the true value of  $\theta$ .

This leads to

$$\sqrt{NT}(\widehat{\theta}^{MLE} - \theta) = \left\{ -\frac{1}{NT} \frac{d^2\ell_2(\check{\theta})}{d\theta d\theta^\top} \right\}^{-1} \frac{1}{\sqrt{NT}} \frac{d\ell_2(\theta)}{d\theta},$$

where  $\check{\theta}$  lies between  $\widehat{\theta}$  and  $\theta$ . By the Slutsky's Theorem and Lemmas 6 and 7, it suffices to show

$$\frac{1}{NT} \frac{d^2\ell_2(\check{\theta})}{d\theta d\theta^\top} - \frac{1}{NT} \frac{d^2\ell_2(\theta)}{d\theta d\theta^\top} = o_p(1). \quad (\text{A.15})$$

Consequently, similar to (A.12), we can consider each block of the two related matrices, respectively. First, we have

$$\begin{aligned} L_{3,NT} &= \frac{1}{NT} \frac{d^2\ell_2(\check{\theta})}{d\rho^2} - \frac{1}{NT} \frac{d^2\ell_2(\theta)}{d\rho^2} \doteq \frac{1}{2N} \left[ \text{tr}\{\Omega^{-1}(\check{\rho})\dot{\Omega}(\check{\rho})\}^2 - \text{tr}\{\Omega^{-1}(\rho)\dot{\Omega}(\rho)\}^2 \right] \\ &\quad - \frac{1}{2N} \left[ \text{tr}\{\Omega^{-1}(\check{\rho})\ddot{\Omega}(\check{\rho}) - \text{tr}\{\Omega^{-1}(\rho)\ddot{\Omega}(\rho)\} \right] \\ &\quad + \frac{1}{2NT} (\check{\sigma}^{-2} - \sigma^{-2}) \sum_{t=2}^T \widehat{\mathcal{E}}_t^\top \ddot{A}_t(\check{\rho}) \widehat{\mathcal{E}}_t + \frac{1}{2NT\sigma^2} \sum_{t=2}^T \widehat{\mathcal{E}}_t^\top \{\ddot{A}_t(\check{\rho}) - \ddot{A}_t(\rho)\} \widehat{\mathcal{E}}_t \\ &= L_{3,NT,1} + L_{3,NT,2} + L_{3,NT,3} + L_{3,NT,4} = o_p(1). \end{aligned}$$

This can be established by a similar calculation for  $\{L_{2,NT,k}\}_{k=1}^4$  in Theorem 3. Then,  $L_{3,NT} = o_p(1)$ , and other blocks of  $\frac{1}{NT} \frac{d^2\ell_2(\check{\theta})}{d\theta d\theta^\top} - \frac{1}{NT} \frac{d^2\ell_2(\theta)}{d\theta d\theta^\top}$  are also  $o_p(1)$ . Thus, (A.15) holds, and this completes the proof of Theorem 4.

## References

Hamilton, J. (1994). *Time Series Analysis*. Princeton, NJ: Princeton University Press.

- Lee, L.-F. (2004). Asymptotic distributions of quasi-maximum likelihood estimators for spatial autoregressive models. *Econometrica*, 72(6):1899–1925.
- Sun, Z. and Wang, H. (2019). Network imputation for a spatial autoregression model with incomplete data. *Statistica Sinica*, *forthcoming*.
